# Supplementary material for: Nociceptive two-point discrimination acuity and body representation failure in polyneuropathy
Source: publisher site journal article supplement (doi:10.1515/sjpain-2022-0039), 2022-08-03
Supplement: Supplementary file 2 [file j_sjpain-2022-0039_suppl_004.docx]

**Supplementary Figure 4**:
