# Supplementary material for: Nociceptive two-point discrimination acuity and body representation failure in polyneuropathy
Source: publisher site journal article supplement (doi:10.1515/sjpain-2022-0039), 2022-08-03
Supplement: Supplementary file 3 [file j_sjpain-2022-0039_suppl_005.docx]

**Supplementary Table 1:**

|  |  | Group Prediction | | |
| --- | --- | --- | --- | --- |
|  |  | HC | PNP-patients | Total |
| Group | HC | 16 | 3 | 19 |
|  | PNP-patients | 2 | 11 | 13 |
|  | Total | 18 | 14 | 32 |
| 84.4% of the patients classified correctly | | | | |
