# Supplementary material for: Nociceptive two-point discrimination acuity and body representation failure in polyneuropathy
Source: publisher site journal article supplement (doi:10.1515/sjpain-2022-0039), 2022-08-03
Supplement: Supplementary file 4 [file j_sjpain-2022-0039_suppl_007.docx]

**Supplementary material**

**Supplementary Figure 1:** Sequence of male feet distorted in length (top row) and sequence of female feet distorted in width (bottom row). To assess body perception and limb representation disturbances Patients were asked which image best represented their own perception of their feet.

**Supplementary Figure 2:** Frequencies of typical PNP symptoms.

**Supplementary Figure 3:** Comparison of the distribution of thresholds and 2ptDT measures between the left and right body side on hands, forearms, calves and feet. Results of the analysis of variance for repeated measures (rm-ANOVA) performed on log-transformed values showed no significant main effects of “body side” (p > 0.024, Bonferroni corrected p < 0.002).

**Supplementary Figure 4:** Distribution of item scores and sum score of the Bath CRPS Body Perception Disturbance Scale (a) and (b) percentage of positive and negative ratings of items 5A-D, 6A and 7.

**Supplementary Table 1:** Cross tabulation of the group prediction by the variables 2ptDTpinprick at hands, 2ptDTlaser at feet and HPT at feet and true group classification (HC versus PNP-patients). In three steps (Wilk’s lambda = 0.46), discriminant analysis (n=32) selected 2ptDTpinprick at hands, 2ptDTlaser at feet and HPT at feet as the most predictive variables for correct classification of PNP versus HC. Fisher’s linear discriminant function was (4.829 x 2ptDTpinprick hands) + (5.804 x 2ptDTlaser feet) – (3,879 x HPT feet) – 11.653. All results above zero were predictive for the presence of PNP versus HC. Employing this discrimination function, 85% of patients could be correctly classified. (Notes: PNP, Polyneuropathy; HC, healthy controls; LHPT, laser-evoked heat pain threshold; 2ptDTpinprick, two-point discrimination threshold for nociceptive pinprick stimuli; 2ptDTLaser, two-point discrimination threshold for nociceptive laser-evoked heat pain stimuli).

**Supplementary Table 2:** Cross tabulation of the group prediction by the variables 2ptDTpinprick at hands, MPT at calves and foot distortion and true group classification (painful versus non painful PNP). In five steps (Wilk’s lambda = 0.25), discriminant analysis (n=19) selected 2ptDTpinprick at hands, MPT at calves and foot distortion as the most predictive variables for correct classification of PNP with vs PNP without pain. Fisher’s linear discriminant function was (5.87 x 2ptDTpinprick hands) - (4.562 x MPT calves) + (0.114 x foot length distortion) – 6.731. All results above zero were predictive for the presence of pain. Employing this discrimination function, 90% of patients could be correctly classified. (Notes: PNP, Polyneuropathy; HC, healthy controls; MPT, mechanical pain threshold; 2ptDTpinprick, two-point discrimination threshold for nociceptive pinprick stimuli)
